# Supplementary material for: Methodological development of tools to measure how women are treated during facility-based childbirth in four countries: labor observation and community survey
Source: Springer Nature journal article supplement (doi:10.1186/s12874-018-0603-x), 2018-11-15
Supplement: MOESM2 [file 16273214]

# Appendix 2. Community survey tool

## CST - Screening

**Country code:**

GHA

---

**Centre number:**

- 3090 - Korle-Bu Teaching Hospital
- 3091 - La General Hospital
- 3092 - Greater Accra Regional (Ridge) Hospital

**Medical Record Number:**

---

**Participant Number:**

*Note: From Screening Log*

---

**Confirm Participant Number:**

---

**SCREENING**

1. a) Were you admitted to this hospital for childbirth? *Y'agye wo ato asopiti ha ma awoo anaa?*

- No/Dabi  
 Yes/Aane

b) Are you  $\geq$  15 years old? *Wo mfe a w'adi ye edunum anaa edununum ne akyire?*

- No/Dabi  
 Yes/Aane

c) Are you staff or a first degree relation to a staff member at this facility? *Wo busuani bi ye adwuma asopiti ha?*

- No/Dabi  
 Yes/Aane

d) Will you live within [defined catchment area] of this facility at 2 to 6 weeks after childbirth? *Mpotamu ha na wote?*

- No/Dabi  
 Yes/Aane

e) Are you willing and able to participate in an interview 2 to 6 weeks after childbirth? *Waye krado, na wobetumi se wo be ma ye n nsemisa bi ho mmuae Nnawotwe mmienu kosi nnan wo wawoo akyi?*

- No/Dabi  
 Yes/Aane

*Women are eligible to participate if they:*

**Q1a = Yes** [Admitted to this hospital for childbirth], *AND*

**Q1b = Yes** [Are  $\geq$  15 years old], *AND*

**Q1c = No** [Are not staff or a first degree relation to a staff member at this facility], *AND*

**Q1d = Yes** [Live within the defined catchment area of the facility 2 to 6 weeks after childbirth] *AND*

**Q1e = Yes** [Are willing and able to participate in an interview 2-6 weeks after childbirth].

f) Is the woman eligible? *owoo ho kwan?*

- Not Eligible  
 Eligible

***If woman is Not eligible, sign and date and stop Community Survey questionnaire here and submit.***

g) If eligible, date of recruitment:

yyyy-mm-dd

---

***Offer consent form and provide time to the woman to review consent form.***

If the woman is now recruited to the study, complete the Contact form with her information.

**Comment:**

---

**Observer code:**

---

**Date completed:**

yyyy-mm-dd

---

**Time completed:**

(00:00-23:59)

---

# CST

**Country Code:**

GHA

---

**Centre number:**

- 3090 - Korle-Bu Teaching Hospital       3091 - La General Hospital
- 3092 - Greater Accra Regional (Ridge) Hospital

**Medical Record Number:**

---

**Participant Number:**

*Note: From Screening Log*

---

**Confirm Participant Number:**

---

**General**

1. a) Has the woman provided written consent to participate? *baa no de ne nsa ahyɛ nwoma ase sɛ obɛma nsemisa no ho mmuae?*

- No/dabi  
 Yes/Aane

**If No, Stop the Community survey questionnaire here**

b) Is the identity of the woman confirmed? *Wa tumi ahu obaa no ahyɛnso de?*

- No/dabi  
 Yes/Aane

c) Date of delivery: *Da awo no kɔɔ so*

yyyy-mm-dd

---

d) Date of interview: *Da a nsemisa no kɔɔ so*

yyyy-mm-dd

---

e) Time of interview: *Bere a nsemisa no kɔɔ so*

(00:00-23:59)

---

f) Results of interview: *Nsemisa no ho nsonsoanso*

- Survey completed/Nhwehwɛ mu no baa awieɛ  
 Survey started but not completed/ Nhwehwɛmu no hyɛɛ ase nanso amma awieɛ  
 Woman unavailable at time of visit/Na ɔbaa no nni ho bere a yekɔɔ ho  
 Woman unavailable for extended period of time/Na ɔbaa no nni ho bere a yɛde nna kakra too nna no so  
 Participation was refused/ Onipa no ampene  
 Dwelling vacant or address is not a dwelling/ Onipa no ampene  
 Dwelling destroyed/Na tenabea no aseɪ  
 Dwelling not found/Yanhu tenabea no

g) Language of interview: *Kasa a nsemisa no kɔɔ so wɔ mu*

- Ghana - English/Ghana-Brofo  
 Ghana - Twi/Ghana-Twi

I would like to ask you some questions about your experience during childbirth and how you and your baby have been since then. You may find some of these questions very personal. However, your answers are crucial for helping to understand the condition of women in Ghana.

Let me assure you that your answers are completely confidential and will not be told to anyone, and no one else in your household will know that you were asked these questions. If I ask you any questions you don't want to answer, just let me know and I will go on to the next question.

*Mepɛ sɛ me bɪsɪ wɔ nɛm bi a ɛfa nea wofaa mu ɛbere a worekɔ wɔ ɛne sɛnea wone wɔ ba no ho te seesei. Nɛmisa no bi befa wabrabɔ ho nanso wɔ mmuae no beboa mmaa a ɛwɔ Ghana nyinaa*

*Mepɛ sɛ me hyɛ wɔ bɔ sɛ yɛbekora mmuae a wode bɛma yɛn no yie na mpo obi a ɔte wɔ fie rente nɛm a yebisaa wɔ no. Sɛ me bɪsɪ wɔ aɛm bi na wompɛ sɛ wobɛma me mmuae a, ka kyere me, na yɛntoa so.*

**General****2. a) How old are you? *Wadi mfe sen?****years*

---

**b) What is your current marital status? *Wa ware mu nsem te sen?***

- Never married/single /Menwaree da/Meye sugyani
- Currently married/Seesei maware
- Separated/Yen ntam atete kakra
- Divorced/Magyae aware
- Widowed/Meho kani aka baabi
- Cohabiting/Onyee me ho ade nanso mene no na ete
- Other/Afofro
- Unknown/Mennim

**c) What is your highest level of formal education? *Wokoo sukuu duruu mpenpenso ben?***

- No education/Mankoo sukuu
- Pre-primary education/mfitiase sukuu
- Incomplete primary education/Manwie mfitiase sukuu
- Complete primary education/Mewiee mfitiase sukuu
- Incomplete secondary education/Manwie ntoaso sukuu
- Complete secondary education/Mewiee ntoaso sukuu
- Incomplete post-secondary/tertiary education /Mewiee ntoaso sukuu esan toa so kakra nanso manwie
- Complete post-secondary/tertiary education /Mewiee ntoaso sukuu /Suapon
- Other/Afofro
- Vocational training/Mekoo sukuu kosuaa nsaano adwuma
- Unknown/Mennim

**If Other, specify: *Se eye afofro a twere:***

---

**d) Approximately how many minutes' drive is your house from the hospital where you gave birth? *Se wode wani kaakae a, donwhere sen na kaa betumi de afiri wo fie akodu asopiti a wokoo woe no?****minutes*

---

**e) How many times have you been pregnant? (Note to data collector: Including times you did not give birth to the baby/babies) *Mpre ahe na wafa afuro da****99 if unknown*

---

**f) How many times have you given birth to a baby (that lived or died) 7 months of pregnancy? *Mperε dodoο sεn na wawoo a na nyinsen no adi abosome nson a wonyaa abofra no anaa wanya abofra no?***

99 if unknown

---

**g) How many children have you given birth to who are now alive? (including most recent childbirth) *Woba a wokuta no yi ka ho a, wo mma sεn na εte ase?***

99 if unknown

---

**h) For your most recent childbirth, by what method did you give birth? *Okwan bεn so na wofa de woo woba a okura wo yi***

- Vaginal delivery/Mekyem woe
- Caesarean section/Yεyεε me operation
- Don't know/Mennim

**3. a) Are you currently breastfeeding? *Wodaso ma wo ba no nufoo?***

- No/Dabi
- Yes/Aane
- Unknown/Mennim

**b) If No, did you ever breastfeed your baby? *Sε dabi a, wama woba no nufoo da?***

- No/Dabi
- Yes/Aane
- Unknown/Mennim

**c) How soon after birth did you start breastfeeding? *Sε aane a, dōnhwere sεn na ediiε ansana worema woba no nufoo?***

- Within 1 hour/Dōnhwere baako
- Within 24 hours/Dōnhwere aduonu nnan mu
- Within 1 week/Wo nnawotwe baako mu
- Longer than 1 week/Bεyε nnawotwe baako akyi
- Unknown/Mennim

## MISTREATMENT

Some women tell us when they give birth they are mistreated, or treated with disrespect while in the hospital. We would like to know how common this problem is, so we would like to ask you your own experiences with childbirth. There are no right or wrong answers to these questions. It is only important to us that we understand your experiences. Nothing you tell us will be linked to your name, your children's names, or the ability of you or your family members to access health care in the future.

Some of these questions may be upsetting or stressful. As I said before, you can skip any question you are not comfortable answering, and you can stop the interview at any point.

*Mmaa bi ka se sε wo kowo wo asopiti a, wotaa yε wōn ayayadeε, anaa yε bu wōn animtia. Mepe sε mebisa se wo nso wofaa bi mu saa εbere a wo woyε no? Mmuae a wobε ma biara ye. Ehia sε yεbεhu nea wofaa mu. Yεmfa wo din anaa wo ba bi din mmata mmuaεbi a worema yεn ho, anaa entumi nsi wone wabusuafoο ho kwan sε wobεkō asopiti daakye.*

*Nsεmisa no bi bεyε wo abufuo kakra nanso wowō akwanya se wobε kwati wōn se wompε sε wobe bua*



## Physical Abuse

**4. At any time during your time in the hospital, did any of the following events occur? Bere a na wowo asopiti no, saa nsem a edidi so yi bi koo so?**

**a) 1. You were pinched by a health worker or other staff? Adwumayefo a wowo ha no bi ati wo da?**

- No/Dabi
- Yes/Aane
- Refuse/Wampene
- Don't know/Unknown /(Mennim)/Yennim

**2. How many times did this happen? Mpen dodoo sen na yei koo so?**

- Once/Preko
- Twice/Mprenu
- Three or more times /Mprensa anaa eboro saa
- Don't know/Unknown /(Mennin) Yennim

**3. When did this happen? Bere ben na yei koo so?**

- Intrapartum (from when you arrived at the hospital until the baby came out) /Efiri bere a wobaa asopiti kosi bere a wo woye
- Postpartum (from when the baby came out until you left the hospital) /Efiri bere a wo woye kosii bere a wofii asopiti ha
- Both intrapartum and postpartum/Bere a ma awoo akawo ene awoo no akyi
- Don't know/Unknown /(Mennim)/Onnim

**4. Who did this to you? Hwan na ode saa yee wo?**

- Doctor/Dokota
- Midwife or Nurse/Neese
- Trainees (Medical student, Nursing, or midwifery student)/Obi a owo ntetee ase
- Non-clinical staff (cleaner, administrator, other)/Obi foforo a oye adwuma wo h
- Unknown/Mennim

**b) 1. You were kicked by a health worker or other staff? Obi de ne nan boo wo?**

- No/Dabi
- Yes/Aane
- Refuse/Wampene
- Don't know/Unknown /(Mennim)/Yennim

**2. How many times did this happen? Mpre dodoɔ sen na yei koo so?**

- Once/Preko
- Twice/Mprenu
- Three or more times /Mprensa anaa eboro saa
- Don't know/Unknown /(Mennin) Yennim

**3. When did this happen? Bere ben na yei koo so?**

- Intrapartum (from when you arrived at the hospital until the baby came out) /Efiri bere a wobaa asopiti kosi bere a wo woye
- Postpartum (from when the baby came out until you left the hospital) /Efiri bere a wo woye kosii bere a wofii asopiti ha
- Both intrapartum and postpartum/Bere a ma awoɔ akawo ene awoɔ no akyi
- Don't know/Unknown /(Mennim)/Onnim

**4. Who did this to you? Hwan na oyee wo saa**

- Doctor/Dokota
- Midwife or Nurse/Neese
- Trainees (Medical student, Nursing, or midwifery student)/Obi a owo ntetee ase
- Non-clinical staff (cleaner, administrator, other)/Obi foforo a oyee adwuma wo h
- Unknown/Mennim

**c) 1. You were slapped by a health worker or other staff? Obi de ne nsa yam boɔ wo?**

- No/Dabi
- Yes/Aane
- Refuse/Wampene
- Don't know/Unknown /(Mennim)/Yennim

**2. How many times did this happen? Mpen dodoɔ sen na yei koo so?**

- Once/Preko
- Twice/Mprenu
- Three or more times /Mprensa anaa eboro saa
- Don't know/Unknown /(Mennin) Yennim

**3. When did this happen? Bere ben na yei koo so?**

- Intrapartum (from when you arrived at the hospital until the baby came out) /Efiri bere a wobaa asopiti kosi bere a wo woye
- Postpartum (from when the baby came out until you left the hospital) /Efiri bere a wo woye kosii bere a wofii asopiti ha
- Both intrapartum and postpartum/Bere a ma awoɔ akawo ene awoɔ no akyi
- Don't know/Unknown /(Mennim)/Onnim

**4. Who did this to you? *Hwan na ɔyɛɛ wo saa***

- Doctor/Dokota
- Midwife or Nurse/Neese
- Trainees (Medical student, Nursing, or midwifery student)/Obi a ɔwo ntetee ase
- Non-clinical staff (cleaner, administrator, other)/Obi foforo a ɔyɛ adwuma wo h
- Unknown/Mennim

**d) 1. You were punched by a health worker or other staff? *Obi de twɛdeɛ bɔɔ wo?***

- No/Dabi
- Yes/Aane
- Refuse/Wampene
- Don't know/Unknown /(Mennim)/Yennim

**2. How many times did this happen? *Mpen dodoo sen na yei kɔɔ so?***

- Once/Preko
- Twice/Mprenu
- Three or more times /Mprensa anaa eboro saa
- Don't know/Unknown /(Mennin) Yennim

**3. When did this happen? *Bere ben na yei kɔɔ so?***

- Intrapartum (from when you arrived at the hospital until the baby came out) /Efiri bere a wobaa asopiti kosi bere a wo woyɛ
- Postpartum (from when the baby came out until you left the hospital) /Efiri bere a wo woyɛ kosii bere a wofii asopiti ha
- Both intrapartum and postpartum/Bere a ma awɔɔ akawo ene awɔɔ no akyi
- Don't know/Unknown /(Mennim)/Onnim

**4. Who did this to you? *Hwan na ɔyɛɛ wo saa***

- Doctor/Dokota
- Midwife or Nurse/Neese
- Trainees (Medical student, Nursing, or midwifery student)/Obi a ɔwo ntetee ase
- Non-clinical staff (cleaner, administrator, other)/Obi foforo a ɔyɛ adwuma wo h
- Unknown/Mennim

**e) 1. You were hit with an instrument by a health worker or other staff? *Obi de nneɛma a yɛde yɛ adwuma wo asopiti no bi bɔɔ wo?***

- No/Dabi
- Yes/Aane
- Refuse/Wampene
- Don't know/Unknown /(Mennim)/Yennim

**2. How many times did this happen? *Mpen dodoɔ sen na yei kɔɔ so?***

- Once/Preko
- Twice/Mprenu
- Three or more times /Mprensa anaa eboro saa
- Don't know/Unknown /(Mennin) Yennim

**3. When did this happen? *Bere ben na yei kɔɔ so?***

- Intrapartum (from when you arrived at the hospital until the baby came out) /Efiri bere a wobaa asopiti kosi bere a wo woyɛ
- Postpartum (from when the baby came out until you left the hospital) /Efiri bere a wo woyɛ kosii bere a wofii asopiti ha
- Both intrapartum and postpartum/Bere a ma awoɔ akawo ene awoɔ no akyi
- Don't know/Unknown /(Mennim)/Onnim

**4. Who did this to you? *Hwan na ɔyɛɛ wo saa***

- Doctor/Dokota
- Midwife or Nurse/Neese
- Trainees (Medical student, Nursing, or midwifery student)/Obi a ɔwo ntetee ase
- Non-clinical staff (cleaner, administrator, other)/Obi foforo a ɔyɛ adwuma wo h
- Unknown/Mennim

**f) 1. You were gagged (eg: something put across or in your mouth to prevent you from speaking or making noise) by a health worker or other staff? *Obi de biribi hyɛɛ wanum sɛnea ɛbɛyɛ na wontumi nkasa anaa nteatea mu?***

- No/Dabi
- Yes/Aane
- Refuse/Wampene
- Don't know/Unknown /(Mennim)/Yennim

**2. How many times did this happen? *Mpen dodoɔ sen na yei kɔɔ so?***

- Once/Preko
- Twice/Mprenu
- Three or more times /Mprensa anaa eboro saa
- Don't know/Unknown /(Mennin) Yennim

**3. When did this happen? *Bere ben na yei kɔɔ so***

- Intrapartum (from when you arrived at the hospital until the baby came out) /Efiri bere a wobaa asopiti kosi bere a wo woyɛ
- Postpartum (from when the baby came out until you left the hospital) /Efiri bere a wo woyɛ kosii bere a wofii asopiti ha
- Both intrapartum and postpartum/Bere a ma awoɔ akawo ene awoɔ no akyi
- Don't know/Unknown /(Mennim)/Onnim

**4. Who did this to you? *Hwan na ɔyɛɛ wo saa?***

- Doctor/Dokota
- Midwife or Nurse/Neese
- Trainees (Medical student, Nursing, or midwifery student)/Obi a ɔwo ntetee ase
- Non-clinical staff (cleaner, administrator, other)/Obi foforo a ɔyɛ adwuma wo h
- Unknown/Mennim

**g) 1. You were physically tied to the bed by a health worker or other staff? *Apomuden ho adwumayefo no bi kyekyeree wo bɔɔ mpa no ho?***

- No/Dabi
- Yes/Aane
- Refuse/Wampene
- Don't know/Unknown /(Mennim)/Yennim

**2. How many times did this happen? *Mpen dodoo sen na yei koo so?***

- Once/Preko
- Twice/Mprenu
- Three or more times /Mprensa anaa eboro saa
- Don't know/Unknown /(Mennin) Yennim

**3. When did this happen? *Bere ben na yei koo so?***

- Intrapartum (from when you arrived at the hospital until the baby came out) /Efiri bere a wobaa asopiti kosi bere a wo woyɛ
- Postpartum (from when the baby came out until you left the hospital) /Efiri bere a wo woyɛ kosii bere a wofii asopiti ha
- Both intrapartum and postpartum/Bere a ma awoo akawo ene awoo no akyi
- Don't know/Unknown /(Mennim)/Onnim

**4. Who did this to you? *Hwan na ɔyɛɛ wo saa***

- Doctor/Dokota
- Midwife or Nurse/Neese
- Trainees (Medical student, Nursing, or midwifery student)/Obi a ɔwo ntetee ase
- Non-clinical staff (cleaner, administrator, other)/Obi foforo a ɔyɛ adwuma wo h
- Unknown/Mennim

**h) 1. You were held down to the bed forcefully by a health worker or other staff? *Apomuden ho adwumayefo no bi miaa wo so wo mpa no so?***

- No/Dabi
- Yes/Aane
- Refuse/Wampene
- Don't know/Unknown /(Mennim)/Yennim

**2. How many times did this happen? *Mpen dodoo sen na yei koo so?***

- Once/Preko
- Twice/Mprenu
- Three or more times /Mprensa anaa eboro saa
- Don't know/Unknown /(Mennin) Yennim

**3. When did this happen? *Bere ben na yei koo so?***

- Intrapartum (from when you arrived at the hospital until the baby came out) /Efiri bere a wobaa asopiti kosi bere a wo woye
- Postpartum (from when the baby came out until you left the hospital) /Efiri bere a wo woye kosii bere a wofii asopiti ha
- Both intrapartum and postpartum/Bere a ma awoo akawo ene awoo no akyi
- Don't know/Unknown /(Mennim)/Onnim

**4. Who did this to you? *Hwan na oye wo saa***

- Doctor/Dokota
- Midwife or Nurse/Neese
- Trainees (Medical student, Nursing, or midwifery student)/Obi a owo ntete ase
- Non-clinical staff (cleaner, administrator, other)/Obi foforo a oye adwuma wo h
- Unknown/Mennim

**i) 1. You had forceful downward pressure placed on your abdomen before the baby came out (fundal pressure)? *Yemiaa wafuru so ansana abofra no reba***

- No/Dabi
- Yes/Aane
- Refuse/Wampene
- Don't know/Unknown /(Mennim)/Yennim

**2. How many times did this happen? *Mpen dodoo sen na yei koo so?***

- Once/Preko
- Twice/Mprenu
- Three or more times /Mprensa anaa eboro saa
- Don't know/Unknown /(Mennin) Yennim

**3. When did this happen? *Bere ben na yei koo so?***

- Intrapartum (from when you arrived at the hospital until the baby came out) /Efiri bere a wobaa asopiti kosi bere a wo woye
- Postpartum (from when the baby came out until you left the hospital) /Efiri bere a wo woye kosii bere a wofii asopiti ha
- Both intrapartum and postpartum/Bere a ma awoo akawo ene awoo no akyi
- Don't know/Unknown /(Mennim)/Onnim

**4. Who did this to you? *Hwan na ɔyɛɛ wo saa***

- Doctor/Dokota
- Midwife or Nurse/Neese
- Trainees (Medical student, Nursing, or midwifery student)/Obi a ɔwo ntetee ase
- Non-clinical staff (cleaner, administrator, other)/Obi foforo a ɔyɛ adwuma wo h
- Unknown/Mennim

**j) 1. You had another form of physical force used against you (please specify)? *Apomuden Adwumayefo no bi de ɔhyɛ too wo so ansana worewo (Deɛ ɛwo he)?***

- No/Dabi
- Yes/Aane
- Refuse/Wampene
- Don't know/Unknown /(Mennim)/Yennim

**If Other, specify: *Sɛ afoforo bi a, kyere***

---

**2. How many times did this happen? *Mpen dodoɔ sen na yei kɔɔ so?***

- Once/Preko
- Twice/Mprenu
- Three or more times /Mprensa anaa eboro saa
- Don't know/Unknown /(Mennin) Yennim

**3. When did this happen? *Bere ben na yei kɔɔ so?***

- Intrapartum (from when you arrived at the hospital until the baby came out) /Efiri bere a wobaa asopiti kosi bere a wo woyɛ
- Postpartum (from when the baby came out until you left the hospital) /Efiri bere a wo woyɛ kosii bere a wofii asopiti ha
- Both intrapartum and postpartum/Bere a ma awoɔ akawo ene awoɔ no akyi
- Don't know/Unknown /(Mennim)/Onnim

**4. Who did this to you? *Hwan na ɔyɛɛ wo saa***

- Doctor/Dokota
- Midwife or Nurse/Neese
- Trainees (Medical student, Nursing, or midwifery student)/Obi a ɔwo ntetee ase
- Non-clinical staff (cleaner, administrator, other)/Obi foforo a ɔyɛ adwuma wo h
- Unknown/Mennim

**Verbal Abuse**

**5. During your time in the hospital, did any of the following events occur? Bere a na wowo asopiti no, nea edidi so yi bi koo so?**

**a) 1. You were shouted or screamed at by a health worker or other staff? Apomuden ho adwumayefo no bi teaa wo?**

- No/Dabi
- Yes/Aane
- Refuse/Wampene
- Don't know/Unknown /(Mennim)/Yennim

**2. How many times did this happen? Mpen dodoo sen na yei koo so?**

- Once/Preko
- Twice/Mpreno
- Three or more times /Mprensa anaa eboro saa
- Don't know/Unknown /(Mennin) Yennim

**3. When did this happen? Bere ben na yei koo so?**

- Intrapartum (from when you arrived at the hospital until the baby came out) /Efiri bere a wobaa asopiti kosi bere a wo woye
- Postpartum (from when the baby came out until you left the hospital) /Efiri bere a wo woye kosii bere a wofii asopiti ha
- Both intrapartum and postpartum/Bere a ma awoo akawo ene awoo no akyi
- Don't know/Unknown /(Mennim)/Onnim

**4. Who did this to you? Hwan na oye wo saa**

- Doctor/Dokota
- Midwife or Nurse/Neese
- Trainees (Medical student, Nursing, or midwifery student)/Obi a owo ntete ase
- Non-clinical staff (cleaner, administrator, other)/Obi foforo a oye adwuma wo h
- Unknown/Mennim

**b) 1. You were insulted by a health worker or other staff? Apomuden Adwumayefo bi dii wo atem?**

- No/Dabi
- Yes/Aane
- Refuse/Wampene
- Don't know/Unknown /(Mennim)/Yennim



**2. How many times did this happen? *Mpen dodoo sen na yei koo so?***

- Once/Preko
- Twice/Mprenu
- Three or more times /Mprensa anaa eboro saa
- Don't know/Unknown /(Mennin) Yennim

**3. When did this happen? *Bere ben na yei koo so?***

- Intrapartum (from when you arrived at the hospital until the baby came out) /Efiri bere a wobaa asopiti kosi bere a wo woye
- Postpartum (from when the baby came out until you left the hospital) /Efiri bere a wo woye kosii bere a wofii asopiti ha
- Both intrapartum and postpartum/Bere a ma awoo akawo ene awoo no akyi
- Don't know/Unknown /(Mennim)/Onnim

**4. Who did this to you? *Hwan na oye wo saa?***

- Doctor/Dokota
- Midwife or Nurse/Neese
- Trainees (Medical student, Nursing, or midwifery student)/Obi a owo ntete ase
- Non-clinical staff (cleaner, administrator, other)/Obi foforo a oye adwuma wo h
- Unknown/Mennim

**c) 1. You were scolded by a health worker or other staff? *Apomuden Adwumayefo bi kaa wanim?***

- No/Dabi
- Yes/Aane
- Refuse/Wampene
- Don't know/Unknown /(Mennim)/Yennim

**2. How many times did this happen? *Mpen dodoo sen na yei koo so?***

- Once/Preko
- Twice/Mprenu
- Three or more times /Mprensa anaa eboro saa
- Don't know/Unknown /(Mennin) Yennim

**3. When did this happen? *Bere ben na yei koo so?***

- Intrapartum (from when you arrived at the hospital until the baby came out) /Efiri bere a wobaa asopiti kosi bere a wo woye
- Postpartum (from when the baby came out until you left the hospital) /Efiri bere a wo woye kosii bere a wofii asopiti ha
- Both intrapartum and postpartum/Bere a ma awoo akawo ene awoo no akyi
- Don't know/Unknown /(Mennim)/Onnim

**4. Who did this to you? Hwan na ɔyɛɛ wo saa**

- Doctor/Dokota
- Midwife or Nurse/Neese
- Trainees (Medical student, Nursing, or midwifery student)/Obi a ɔwo ntetee ase
- Non-clinical staff (cleaner, administrator, other)/Obi foforo a ɔyɛ adwuma wo h
- Unknown/Mennim

**d) 1. You were mocked by a health worker or other staff? Apomuden mu Adwumayefo bi dii wo ho fɛw**

- No/Dabi
- Yes/Aane
- Refuse/Wampene
- Don't know/Unknown /(Mennim)/Yennim

**2. How many times did this happen? Mpen dodoo sen na yei koo so?**

- Once/Preko
- Twice/Mprenu
- Three or more times /Mprensa anaa eboro saa
- Don't know/Unknown /(Mennin) Yennim

**3. When did this happen? Bere ben na yei koo so?**

- Intrapartum (from when you arrived at the hospital until the baby came out) /Efiri bere a wobaa asopiti kosi bere a wo woyɛ
- Postpartum (from when the baby came out until you left the hospital) /Efiri bere a wo woyɛ kosii bere a wofii asopiti ha
- Both intrapartum and postpartum/Bere a ma awoo akawo ene awoo no akyi
- Don't know/Unknown /(Mennim)/Onnim

**4. Who did this to you? Hwan na ɔyɛɛ wo saa**

- Doctor/Dokota
- Midwife or Nurse/Neese
- Trainees (Medical student, Nursing, or midwifery student)/Obi a ɔwo ntetee ase
- Non-clinical staff (cleaner, administrator, other)/Obi foforo a ɔyɛ adwuma wo h
- Unknown/Mennim

**e) 1. The health worker or other staff member made negative comments about your physical appearance (such as your weight, private parts, cleanliness or other parts of your body)? Apomuden mu Adwumayefo bi kaa nsem a enye de wo senea wo kese, wanam mu anaa wahote ho?**

- No/Dabi
- Yes/Aane
- Refuse/Wampene
- Don't know/Unknown /(Mennim)/Yennim

**2. How many times did this happen? *Mpen dodoɔ sen na yei kɔɔ so?***

- Once/Preko
- Twice/Mprenu
- Three or more times /Mprensa anaa eboro saa
- Don't know/Unknown /(Mennin) Yennim

**3. When did this happen? *Bere ben na yei kɔɔ so?***

- Intrapartum (from when you arrived at the hospital until the baby came out) /Efiri bere a wobaa asopiti kosi bere a wo woyɛ
- Postpartum (from when the baby came out until you left the hospital) /Efiri bere a wo woyɛ kosii bere a wofii asopiti ha
- Both intrapartum and postpartum/Bere a ma awoɔ akawo ene awoɔ no akyi
- Don't know/Unknown /(Mennim)/Onnim

**4. Who did this to you? *Hwan na ɔyɛɛ wo saa***

- Doctor/Dokota
- Midwife or Nurse/Neese
- Trainees (Medical student, Nursing, or midwifery student)/Obi a ɔwo ntetee ase
- Non-clinical staff (cleaner, administrator, other)/Obi foforo a ɔyɛ adwuma wo h
- Unknown/Mennim

**f) 1. The health worker or other staff member made negative comments about your baby's physical appearance (such as his/her appearance, sex or other aspects of the baby)? *Apomuden mu Adwumayefo bi kaa nsem bi a enyɛ de faa sɛnea wo ba no te anaa sɛ oye ɔbarima anaa obaa?***

- No/Dabi
- Yes/Aane
- Refuse/Wampene
- Don't know/Unknown /(Mennim)/Yennim

**2. How many times did this happen? *Mpen dodoɔ sen na yei kɔɔ so?***

- Once/Preko
- Twice/Mprenu
- Three or more times /Mprensa anaa eboro saa
- Don't know/Unknown /(Mennin) Yennim

**3. When did this happen? *Bere ben na yei kɔɔ so?***

- Intrapartum (from when you arrived at the hospital until the baby came out) /Efiri bere a wobaa asopiti kosi bere a wo woyɛ
- Postpartum (from when the baby came out until you left the hospital) /Efiri bere a wo woyɛ kosii bere a wofii asopiti ha
- Both intrapartum and postpartum/Bere a ma awoɔ akawo ene awoɔ no akyi
- Don't know/Unknown /(Mennim)/Onnim

**4. Who did this to you? *Hwan na ɔyɛɛ wo saa***

- Doctor/Dokota
- Midwife or Nurse/Neese
- Trainees (Medical student, Nursing, or midwifery student)/Obi a ɔwo ntetee ase
- Non-clinical staff (cleaner, administrator, other)/Obi foforo a ɔyɛ adwuma wo h
- Unknown/Mennim

**g) 1. The health worker or other staff member made negative comments to you regarding your sexual activity? *Apomuden mu Adwumayefo bi kaa nsem bi a enye de faa senea wo ne mmarima hyia/da mu?***

- No/Dabi
- Yes/Aane
- Refuse/Wampene
- Don't know/Unknown /(Mennim)/Yennim

**2. How many times did this happen? *Mpen dodoo sen na yei koo so?***

- Once/Preko
- Twice/Mprenu
- Three or more times /Mprensa anaa eboro saa
- Don't know/Unknown /(Mennin) Yennim

**3. When did this happen? *Bere ben na yei koo so?***

- Intrapartum (from when you arrived at the hospital until the baby came out) /Efiri bere a wobaa asopiti kosi bere a wo woye
- Postpartum (from when the baby came out until you left the hospital) /Efiri bere a wo woye kosii bere a wofii asopiti ha
- Both intrapartum and postpartum/Bere a ma awoo akawo ene awoo no akyi
- Don't know/Unknown /(Mennim)/Onnim

**4. Who did this to you? *Hwan na ɔyɛɛ wo saa***

- Doctor/Dokota
- Midwife or Nurse/Neese
- Trainees (Medical student, Nursing, or midwifery student)/Obi a ɔwo ntetee ase
- Non-clinical staff (cleaner, administrator, other)/Obi foforo a ɔyɛ adwuma wo h
- Unknown/Mennim

**h) 1. The health worker or other staff threatened you with a medical procedure (such as episiotomy or caesarean section)? *Apomuden mu Adwumayefo bi hunahuna wo se yebeye wo biribi te se operation anaa yebetwa wase***

- No/Dabi
- Yes/Aane
- Refuse/Wampene
- Don't know/Unknown /(Mennim)/Yennim

**2. How many times did this happen? *Mpen dodoo sen na yei koo so?***

- Once/Preko
- Twice/Mprenu
- Three or more times /Mprensa anaa eboro saa
- Don't know/Unknown /(Mennin) Yennim

**3. When did this happen? *Bere ben na yei koo so?***

- Intrapartum (from when you arrived at the hospital until the baby came out) /Efiri bere a wobaa asopiti kosi bere a wo woye
- Postpartum (from when the baby came out until you left the hospital) /Efiri bere a wo woye kosii bere a wofii asopiti ha
- Both intrapartum and postpartum/Bere a ma awoo akawo ene awoo no akyi
- Don't know/Unknown /(Mennim)/Onnim

**4. Who did this to you? *Hwan na oye wo saa***

- Doctor/Dokota
- Midwife or Nurse/Neese
- Trainees (Medical student, Nursing, or midwifery student)/Obi a owo ntete ase
- Non-clinical staff (cleaner, administrator, other)/Obi foforo a oye adwuma wo h
- Unknown/Mennim

**i) 1. The health worker or other staff threatened you with physical violence? *Apomuden mu adwumayefo bi hunahuna wo se yeebo wo anaa?***

- No/Dabi
- Yes/Aane
- Refuse/Wampene
- Don't know/Unknown /(Mennim)/Yennim

**2. How many times did this happen? *Mpen dodoo sen na yei koo so?***

- Once/Preko
- Twice/Mprenu
- Three or more times /Mprensa anaa eboro saa
- Don't know/Unknown /(Mennin) Yennim

**3. When did this happen? *Bere ben na yei koo so?***

- Intrapartum (from when you arrived at the hospital until the baby came out) /Efiri bere a wobaa asopiti kosi bere a wo woye
- Postpartum (from when the baby came out until you left the hospital) /Efiri bere a wo woye kosii bere a wofii asopiti ha
- Both intrapartum and postpartum/Bere a ma awoo akawo ene awoo no akyi
- Don't know/Unknown /(Mennim)/Onnim

**4. Who did this to you? *Hwan na ɔyɛɛ wo saa***

- Doctor/Dokota
- Midwife or Nurse/Neese
- Trainees (Medical student, Nursing, or midwifery student)/Obi a ɔwo ntetee ase
- Non-clinical staff (cleaner, administrator, other)/Obi foforo a ɔyɛ adwuma wo h
- Unknown/Mennim

**j) 1. The health worker or other staff threatened that if you did not comply, you or your baby would have poor outcome: *Apomuden mu adwumayefo bi hunahuna wo sɛ, sɛ woamma yanyɛ nea yɛbɛyɛ ama wo a, wankasa anaa woba no ɛnwie papa:***

- No/Dabi
- Yes/Aane
- Refuse/Wampene
- Don't know/Unknown /(Mennim)/Yennim

**2. How many times did this happen? *Mpen dodoo sen na yei koo so?***

- Once/Preko
- Twice/Mprenu
- Three or more times /Mprensa anaa eboro saa
- Don't know/Unknown /(Mennin) Yennim

**3. When did this happen? *Bere ben na yei koo so?***

- Intrapartum (from when you arrived at the hospital until the baby came out) /Efiri bere a wobaa asopiti kosi bere a wo woyɛ
- Postpartum (from when the baby came out until you left the hospital) /Efiri bere a wo woyɛ kosii bere a wofii asopiti ha
- Both intrapartum and postpartum/Bere a ma awoo akawo ene awoo no akyi
- Don't know/Unknown /(Mennim)/Onnim

**4. Who did this to you? *Hwan na ɔyɛɛ wo saa***

- Doctor/Dokota
- Midwife or Nurse/Neese
- Trainees (Medical student, Nursing, or midwifery student)/Obi a ɔwo ntetee ase
- Non-clinical staff (cleaner, administrator, other)/Obi foforo a ɔyɛ adwuma wo h
- Unknown/Mennim

**k) 1. The health worker or other staff threatened to withhold care from you or your baby: *Apomuden odwumayeni bi hunahuna wo sɛ onhwɛ wo anaa wo ba no?***

- No/Dabi
- Yes/Aane
- Refuse/Wampene
- Don't know/Unknown /(Mennim)/Yennim

**2. How many times did this happen? *Mpen dodoo sen na yei koo so?***

- Once/Preko
- Twice/Mpreno
- Three or more times /Mprensa anaa eboro saa
- Don't know/Unknown /(Mennin) Yennim

**3. When did this happen? *Bere ben na yei koo so?***

- Intrapartum (from when you arrived at the hospital until the baby came out) /Efiri bere a wobaa asopiti kosi bere a wo woye
- Postpartum (from when the baby came out until you left the hospital) /Efiri bere a wo woye kosii bere a wofii asopiti ha
- Both intrapartum and postpartum/Bere a ma awoo akawo ene awoo no akyi
- Don't know/Unknown /(Mennim)/Onnim

**4. Who did this to you? *Hwan na oye wo saa***

- Doctor/Dokota
- Midwife or Nurse/Neese
- Trainees (Medical student, Nursing, or midwifery student)/Obi a owo ntete ase
- Non-clinical staff (cleaner, administrator, other)/Obi foforo a oye adwuma wo h
- Unknown/Mennim

**l) 1. The health worker or other staff blamed you for something that happened to you or your baby during your time in hospital: *Apomuden adwumayeni bi boo wo soboro wo bibi a esii wo wawoo mu?***

- No/Dabi
- Yes/Aane
- Refuse/Wampene
- Don't know/Unknown /(Mennim)/Yennim

**2. How many times did this happen? *Mpen dodoo sen na yei koo so?***

- Once/Preko
- Twice/Mpreno
- Three or more times /Mprensa anaa eboro saa
- Don't know/Unknown /(Mennin) Yennim

**3. When did this happen? *Bere ben na yei koo so?***

- Intrapartum (from when you arrived at the hospital until the baby came out) /Efiri bere a wobaa asopiti kosi bere a wo woye
- Postpartum (from when the baby came out until you left the hospital) /Efiri bere a wo woye kosii bere a wofii asopiti ha
- Both intrapartum and postpartum/Bere a ma awoo akawo ene awoo no akyi
- Don't know/Unknown /(Mennim)/Onnim

**4. Who did this to you? *Hwan na ɔyɛɛ wo saa***

- Doctor/Dokota
- Midwife or Nurse/Neese
- Trainees (Medical student, Nursing, or midwifery student)/Obi a ɔwo ntetee ase
- Non-clinical staff (cleaner, administrator, other)/Obi foforo a ɔyɛ adwuma wo h
- Unknown/Mennim

**m) 1. The health worker or other staff hissed at you during your time in hospital? *Apɔmuden mu adwumayeni bi twee wo bere a na wowɔ asopiti ho?***

- No/Dabi
- Yes/Aane
- Refuse/Wampene
- Don't know/Unknown /(Mennim)/Yennim

**2. How many times did this happen? *Mpen dodoo sen na yei koo so?***

- Once/Preko
- Twice/Mprenu
- Three or more times /Mprensa anaa eboro saa
- Don't know/Unknown /(Mennin) Yennim

**3. When did this happen? *Bere ben na yei koo so?***

- Intrapartum (from when you arrived at the hospital until the baby came out) /Efiri bere a wobaa asopiti kosi bere a wo woyɛ
- Postpartum (from when the baby came out until you left the hospital) /Efiri bere a wo woyɛ kosii bere a wofii asopiti ha
- Both intrapartum and postpartum/Bere a ma awoo akawo ene awoo no akyi
- Don't know/Unknown /(Mennim)/Onnim

**4. Who did this to you? *Hwan na ɔyɛɛ wo saa***

- Doctor/Dokota
- Midwife or Nurse/Neese
- Trainees (Medical student, Nursing, or midwifery student)/Obi a ɔwo ntetee ase
- Non-clinical staff (cleaner, administrator, other)/Obi foforo a ɔyɛ adwuma wo h
- Unknown/Mennim

**n) 1. Other use of verbal abuse against you (please specify): *obi san kaa biribi tiaa wo?***

- No/Dabi
- Yes/Aane
- Refuse/Wampene
- Don't know/Unknown /(Mennim)/Yennim



If Other, specify: *Sɛ afoforo bi a, kyere*

---

**2. How many times did this happen? *Mpen dodoo sen na yei koo so?***

- Once/Preko
- Twice/Mprenu
- Three or more times /Mprensa anaa eboro saa
- Don't know/Unknown /(Mennin) Yennim

**3. When did this happen? *Bere ben na yei koo so?***

- Intrapartum (from when you arrived at the hospital until the baby came out) /Efiri bere a wobaa asopiti kosi bere a wo woye
- Postpartum (from when the baby came out until you left the hospital) /Efiri bere a wo woye kosii bere a wofii asopiti ha
- Both intrapartum and postpartum/Bere a ma awoo akawo ene awoo no akyi
- Don't know/Unknown /(Mennim)/Onnim

**4. Who did this to you? *Hwan na oye wo saa***

- Doctor/Dokota
- Midwife or Nurse/Neese
- Trainees (Medical student, Nursing, or midwifery student)/Obi a owo ntete ase
- Non-clinical staff (cleaner, administrator, other)/Obi foforo a oye adwuma wo h
- Unknown/Mennim

## Stigma and Discrimination

**6. During the time in hospital, did any of the following events occur? *Mmere a wowo asopiti no, nea edidi so yi bi sii?***

**a) 1. A health worker or staff made negative comments to you regarding your ethnicity, race, tribe or culture: *Adwumayefo no bi kaa nsem a efa wa busua,baabi a wofi ene wa mammere ho a na enfata***

- No/Dabi
- Yes/Aane
- Refuse/Wampene
- Don't know/Unknown /(Mennim)/Yennim

**2. How many times did this happen? *Mpen dodoo sen na yei koo so?***

- Once/Preko
- Twice/Mprenu
- Three or more times /Mprensa anaa eboro saa
- Don't know/Unknown /(Mennin) Yennim

**3. When did this happen? *Bere ben na yei koo so?***

- Intrapartum (from when you arrived at the hospital until the baby came out) /Efiri bere a wobaa asopiti kosi bere a wo woye
- Postpartum (from when the baby came out until you left the hospital) /Efiri bere a wo woye kosii bere a wofii asopiti ha
- Both intrapartum and postpartum/Bere a ma awoo akawo ene awoo no akyi
- Don't know/Unknown /(Mennim)/Onnim

**4. Who did this to you? *Hwan na oye wo saa***

- Doctor/Dokota
- Midwife or Nurse/Neese
- Trainees (Medical student, Nursing, or midwifery student)/Obi a owo ntete ase
- Non-clinical staff (cleaner, administrator, other)/Obi foforo a oye adwuma wo h
- Unknown/Mennim

**b) 1. A health worker or staff made negative comments to you regarding your religion: *Adwumayefo no bi kaa nsem a emfata wo osom a wosom ho***

- No/Dabi
- Yes/Aane
- Refuse/Wampene
- Don't know/Unknown /(Mennim)/Yennim

**2. How many times did this happen? *Mpen dodoo sen na yei koo so?***

- Once/Preko
- Twice/Mprenu
- Three or more times /Mprensa anaa eboro saa
- Don't know/Unknown /(Mennin) Yennim

**3. When did this happen? *Bere ben na yei koo so?***

- Intrapartum (from when you arrived at the hospital until the baby came out) /Efiri bere a wobaa asopiti kosi bere a wo woye
- Postpartum (from when the baby came out until you left the hospital) /Efiri bere a wo woye kosii bere a wofii asopiti ha
- Both intrapartum and postpartum/Bere a ma awoo akawo ene awoo no akyi
- Don't know/Unknown /(Mennim)/Onnim

**4. Who did this to you? *Hwan na oye wo saa***

- Doctor/Dokota
- Midwife or Nurse/Neese
- Trainees (Medical student, Nursing, or midwifery student)/Obi a owo ntete ase
- Non-clinical staff (cleaner, administrator, other)/Obi foforo a oye adwuma wo h
- Unknown/Mennim

**c) 1. A health worker or staff made negative comments to you regarding your age: *Apomuden odwumayefo bi kaa nsem a emfata wo wo mfe a wadi ho?***

- No/Dabi
- Yes/Aane
- Refuse/Wampene
- Don't know/Unknown /(Mennim)/Yennim

**2. How many times did this happen? *Mpen dodoo sen na yei koo so?***

- Once/Preko
- Twice/Mprenu
- Three or more times /Mprensa anaa eboro saa
- Don't know/Unknown /(Mennin) Yennim

**3. When did this happen? *Bere ben na yei koo so?***

- Intrapartum (from when you arrived at the hospital until the baby came out) /Efiri bere a wobaa asopiti kosi bere a wo woye
- Postpartum (from when the baby came out until you left the hospital) /Efiri bere a wo woye kosii bere a wofii asopiti ha
- Both intrapartum and postpartum/Bere a ma awoo akawo ene awoo no akyi
- Don't know/Unknown /(Mennim)/Onnim

**4. Who did this to you? *Hwan na ɔyɛɛ wo saa***

- Doctor/Dokota
- Midwife or Nurse/Neese
- Trainees (Medical student, Nursing, or midwifery student)/Obi a ɔwo ntetee ase
- Non-clinical staff (cleaner, administrator, other)/Obi foforo a ɔyɛ adwuma wo h
- Unknown/Mennim

**d) 1. A health worker or staff made negative comments to you regarding whether you were married or not: *Odwumayeni bi kaa nsem bi a emfata wo se wonwaree anaa waware ho***

- No/Dabi
- Yes/Aane
- Refuse/Wampene
- Don't know/Unknown /(Mennim)/Yennim

**2. How many times did this happen? *Mpen dodoo sen na yei koo so?***

- Once/Preko
- Twice/Mprenu
- Three or more times /Mprensa anaa eboro saa
- Don't know/Unknown /(Mennin) Yennim

**3. When did this happen? *Bere ben na yei koo so?***

- Intrapartum (from when you arrived at the hospital until the baby came out) /Efiri bere a wobaa asopiti kosi bere a wo woyɛ
- Postpartum (from when the baby came out until you left the hospital) /Efiri bere a wo woyɛ kosii bere a wofii asopiti ha
- Both intrapartum and postpartum/Bere a ma awoɔ akawo ene awoɔ no akyi
- Don't know/Unknown /(Mennim)/Onnim

**4. Who did this to you? *Hwan na ɔyɛɛ wo saa***

- Doctor/Dokota
- Midwife or Nurse/Neese
- Trainees (Medical student, Nursing, or midwifery student)/Obi a ɔwo ntetee ase
- Non-clinical staff (cleaner, administrator, other)/Obi foforo a ɔyɛ adwuma wo h
- Unknown/Mennim

**e) 1. A health worker or staff made negative comments to you regarding your level of education or literacy: *Odwumayeni bi kaa nsem bi a emfata wo wo sukuu a wokoe ho?***

- No/Dabi
- Yes/Aane
- Refuse/Wampene
- Don't know/Unknown /(Mennim)/Yennim

**2. How many times did this happen? *Mpen dodoo sen na yei koo so?***

- Once/Preko
- Twice/Mpreno
- Three or more times /Mprensa anaa eboro saa
- Don't know/Unknown /(Mennin) Yennim

**3. When did this happen? *Bere ben na yei koo so?***

- Intrapartum (from when you arrived at the hospital until the baby came out) /Efiri bere a wobaa asopiti kosi bere a wo woye
- Postpartum (from when the baby came out until you left the hospital) /Efiri bere a wo woye kosii bere a wofii asopiti ha
- Both intrapartum and postpartum/Bere a ma awoo akawo ene awoo no akyi
- Don't know/Unknown /(Mennim)/Onnim

**4. Who did this to you? *Hwan na oye wo saa***

- Doctor/Dokota
- Midwife or Nurse/Neese
- Trainees (Medical student, Nursing, or midwifery student)/Obi a owo ntete ase
- Non-clinical staff (cleaner, administrator, other)/Obi foforo a oye adwuma wo h
- Unknown/Mennim

**f) 1. A health worker or staff made negative comments to you regarding your economic circumstances: *Odwumayeni bi kaa nsem a emfata efa wo sikasem ho?***

- No/Dabi
- Yes/Aane
- Refuse/Wampene
- Don't know/Unknown /(Mennim)/Yennim

**2. How many times did this happen? *Mpen dodoo sen na yei koo so?***

- Once/Preko
- Twice/Mpreno
- Three or more times /Mprensa anaa eboro saa
- Don't know/Unknown /(Mennin) Yennim

**3. When did this happen? *Bere ben na yei koo so?***

- Intrapartum (from when you arrived at the hospital until the baby came out) /Efiri bere a wobaa asopiti kosi bere a wo woye
- Postpartum (from when the baby came out until you left the hospital) /Efiri bere a wo woye kosii bere a wofii asopiti ha
- Both intrapartum and postpartum/Bere a ma awoo akawo ene awoo no akyi
- Don't know/Unknown /(Mennim)/Onnim

**4. Who did this to you? Hwan na ɔyɛɛ wo saa**

- Doctor/Dokota
- Midwife or Nurse/Neese
- Trainees (Medical student, Nursing, or midwifery student)/Obi a ɔwo ntetee ase
- Non-clinical staff (cleaner, administrator, other)/Obi foforo a ɔyɛ adwuma wo h
- Unknown/Mennim

**g) 1. A health worker or staff made negative comments to you regarding your HIV status: Odwumayeni bi kaa nsem bi a emfata a efa wo HIV ho**

- No/Dabi
- Yes/Aane
- Refuse/Wampene
- Don't know/Unknown /(Mennim)/Yennim

**2. How many times did this happen? Mpen dodoo sen na yei koo so?**

- Once/Preko
- Twice/Mprenu
- Three or more times /Mprensa anaa eboro saa
- Don't know/Unknown /(Mennin) Yennim

**3. When did this happen? Bere ben na yei koo so?**

- Intrapartum (from when you arrived at the hospital until the baby came out) /Efiri bere a wobaa asopiti kosi bere a wo woye
- Postpartum (from when the baby came out until you left the hospital) /Efiri bere a wo woye kosii bere a wofii asopiti ha
- Both intrapartum and postpartum/Bere a ma awoo akawo ene awoo no akyi
- Don't know/Unknown /(Mennim)/Onnim

**4. Who did this to you? Hwan na ɔyɛɛ wo saa**

- Doctor/Dokota
- Midwife or Nurse/Neese
- Trainees (Medical student, Nursing, or midwifery student)/Obi a ɔwo ntetee ase
- Non-clinical staff (cleaner, administrator, other)/Obi foforo a ɔyɛ adwuma wo h
- Unknown/Mennim

## Vaginal Examinations

**7. During labour and delivery, women generally receive a vaginal examination: *Sɛ eduru bere a mmaa rekowo a, mpɛn pii no yɛhwɛ sɛnea wɔn ase te:***

**a) Did you receive a vaginal examination at any time in hospital? *Obi de ne nsa hyɛɛ wase bere bi wɔ asopiti ho ?***

- No/Dabi
- Yes/Aane
- Refuse/Wampene
- Don't know/Unknown /(Mennim)/Yennim

**b) Did the health worker explain to you why a vaginal examination was needed? *Apɔmuden mu odwumayeni no kyereɛ wo nea enti a ehia sɛ yɛhwɛ wase?***

- No/Dabi
- Yes/Aane
- Refuse/Wampene
- Don't know/Unknown /(Mennim)/Yennim

**c) Did the health worker ask you permission before performing vaginal examination? *Apɔmuden mu odwumayeni no sereɛ kwan wɔ wo ho ansana na ɔhwɛ wase?***

- No/Dabi
- Yes/Aane
- Refuse/Wampene
- Don't know/Unknown /(Mennim)/Yennim

**d) Did a staff member discuss your private information about your health in a way that others could hear? *Odwumayeni bi kaa wokoa mu nsem bi a efa wapɔmuden ho a obi bɛtumi ate?***

- No/Dabi
- Yes/Aane
- Refuse/Wampene
- Don't know/Unknown /(Mennim)/Yennim

**e) Were vaginal examinations conducted privately (in a way that other people could not see)? *Bere a yɛhwɛɛ wase no, yeyɛɛ no kokoa mu sɛ nea obi ntumi nhu?***

- No/Dabi
- Yes/Aane
- Refuse/Wampene
- Don't know/Unknown /(Mennim)/Yennim

f) In general, how would you describe your experience of these vaginal examinations? *Ne nyinna mu no, sen na wobeka afa sɛnea wase hwɛ no kɔe ho?*

- Comfortable/Eye
- A little uncomfortable/ɛnyɛ kakra
- Quite uncomfortable/ɛnyɛ papa
- Very uncomfortable/ɛnyɛ koraa
- Unknown/Yennim

### Pain Relief

8. a) During your time in the hospital, were you offered any form of pain relief? *Bere a wowɔ asopiti ho no, so yɛbisaa wosɛ yɛnma wo aduro a ɛbɛma yaw no ano abrɛ ase?*

- No/Dabi
- Yes/Aane
- Refuse/Wampene
- Don't know/Unknown /(Mennim)/Yennim

b) Did you request pain relief during your time in hospital? *Bere a wowɔ asopiti ho no wo bisaa sɛ yɛmma wo aduro a ɛbɛma yaw no abrɛ ase?*

- No/Dabi
- Yes/Aane
- Refuse/Wampene
- Don't know/Unknown /(Mennim)/Yennim

c) Did you receive pain relief during your time in hospital? *Yɛmaa wo aduro a ɛbɛma wo yaw no abrɛ ase?*

- No/Dabi
- Yes/Aane
- Refuse/Wampene
- Don't know/Unknown /(Mennim)/Yennim

d) During your time in the hospital, were you denied pain relief for any reason? *Wowɔ asopiti no wokyerɛ wo nea enti a ɛnsɛ sɛ wɔnma wo aduro a ɛbɛma wo yaw no abrɛ ase?*

- No/Dabi
- Yes/Aane
- Refuse/Wampene
- Don't know/Unknown /(Mennim)/Yennim



**Mobilization, Fluids and Companion****9. During your time in hospital: *Bere a wowo asopiti ho no***

a) Did you have easy access to water or other oral fluids? *Wo nyaa nsuo anaa annomniε bi ho kwan?*

- No/Dabi
- Yes/Aane
- Refuse/Wampene
- Don't know/Unknown /(Mennim)/Yennim

b) Were you allowed to eat? *Yεpene ma wo didiε?*

- No/Dabi
- Yes/Aane
- Refuse/Wampene
- Don't know/Unknown /(Mennim)/Yennim

c) Were you told that you could walk or move around during labour? *Yεka kyereε wo sε wobεtumi anante bere a awoo aka wo no?*

- No/Dabi
- Yes/Aane
- Refuse/Wampene
- Don't know/Unknown /(Mennim)/Yennim

d) Did you walk or move around during labour? *Wo nantee anaa wotwaa wo ho kakra bere a na awoo aka wo?*

- No/Dabi
- Yes/Aane
- Refuse/Wampene
- Don't know/Unknown /(Mennim)/Yennim

10. a) During your time in hospital, were you allowed to have a birth companion present? For example, this includes your husband, a friend, sister, mother-in-law, etc.? *Bere a wowo asopiti no yεmaa wo kwan sε obi ntena wo ho?)(Sε ebia wase, wo kunu, anaa wadamfo?*

- No/Dabi
- Yes/Aane
- Refuse/Wampene
- Don't know/Unknown /(Mennim)/Yennim

b) 1. During your time in hospital, did you have a birth companion present at any point? *Bere a wowo asopiti no yεmaa obi kwan sε ommra wo nkyεn?*

- No/Dabi
- Yes/Aane
- Refuse/Wampene
- Don't know/Unknown /(Mennim)/Yennim

**b) 2. If yes, who was the companion? *Sε εye aane a hwan ne nea ɔtenaa wo ho no?***

- Husband/Male partner /Kunu/Mpena
- Family member/Obusuan
- Friend/Adamfo
- Doula/Obi a ɔtena awofoɔ ho
- Traditional birth attendant/Ofie ni a ogye awoo
- Other/Afoforo

**If Other, specify: *Sε afoforo bi a, kyere***

---

**b) 3. When was the companion present? *Bere bεn na na onipa no wɔ wo nkyεn?***

- During labour only/Bere a awo aka me no pε
- During childbirth only/Bere a merewo
- After childbirth only/Mawo akyi nko
- During labour and childbirth only/Nigba irobi ati ibimo
- During labour and after childbirth only/Bere a awo aka me ne mawo akyi nko
- During childbirth and after childbirth only/Bere a merewo ne mawo akyi nko
- During labour, childbirth and after childbirth/Bere a awo aka me,mawo ne mawo akyi
- Don't know/Unknown /Mennim/Onnim

### Unreasonable Demands, Fee Structures and Neglect

**11. After the birth, were you instructed to clean up your own blood, urine, faeces or amniotic fluid? Wawo akyi no obi hyɛ wo sɛ pepa wo mogya, dwonsɔ, agyanaa anaa nsuo na egina woba no ho?**

- No/Dabi
- Yes/Aane
- Refuse/Wampene
- Don't know/Unknown /(Mennim)/Yennim

**12. Did staff suggest or ask you (or your family or friends) for a bribe, informal payment or gift? Odwumayɛni bisaa wo, (wabusua, anaa wo nnanfonom) sɛ wɔmma no akyɛdeɛ bi, anaa wɔntua sika bi a na eni se otua?**

- No/Dabi
- Yes/Aane
- Refuse/Wampene
- Don't know/Unknown /(Mennim)/Yennim

**13. Do you agree with the following statements? Wopene anaa wompene kasamu a edidi so yi?**

**a) During my time in hospital for childbirth I felt ignored by the health workers or staff: Bere a mewɔ asopiti a merekɔwo no mefaa no sɛ adwumayɛfo no apo me**

- Strongly agree/Mo gba gan-an
- Agree/Mo gba
- Neutral/Mi o fi sibikan
- Disagree/Mi o gba
- Strongly disagree/Mi o gba rara
- Unknown/MI o mo

**b) During my time in hospital for childbirth I felt neglected by the health workers or staff: Bere a mewɔ asopiti a merekɔwo no mefaa no sɛ adwumayɛfo no amma me nkyɛn**

- Strongly agree/Mo gba gan-an
- Agree/Mo gba
- Neutral/Mi o fi sibikan
- Disagree/Mi o gba
- Strongly disagree/Mi o gba rara
- Unknown/MI o mo

**c) During my time in hospital for childbirth I felt that my presence was a nuisance for the health workers or staff: *Bere a mewo asopiti a merekwo no mefaa no se me ho teetee adwumayefo no***

- Strongly agree/Mo gba gan-an
- Agree/Mo gba
- Neutral/Mi o fi sibikan
- Disagree/Mi o gba
- Strongly disagree/Mi o gba rara
- Unknown/MI o mo

**d) During my time in hospital for childbirth I had to wait for long periods of time before I was attended by health workers: *Bere a mewo asopiti a merekwo no, metwen nnonhwere bebre ansana wrehwε me***

- Strongly agree/Mo gba gan-an
- Agree/Mo gba
- Neutral/Mi o fi sibikan
- Disagree/Mi o gba
- Strongly disagree/Mi o gba rara
- Unknown/MI o mo

**e) During my time in hospital for childbirth I felt emotionally supported by the health workers or staff: *Bere a mewo asopiti a merekwo no, adwumayefo no boaa me***

- Strongly agree/Mo gba gan-an
- Agree/Mo gba
- Neutral/Mi o fi sibikan
- Disagree/Mi o gba
- Strongly disagree/Mi o gba rara
- Unknown/MI o mo

**f) During my time in hospital for childbirth, the health workers or staff listened to my concerns: *Bere a mewo asopiti a merekwo no, adwumayefo no tiee masεm/mehaw wε aso pa mu***

- Strongly agree/Mo gba gan-an
- Agree/Mo gba
- Neutral/Mi o fi sibikan
- Disagree/Mi o gba
- Strongly disagree/Mi o gba rara
- Unknown/MI o mo

**g) During my time in hospital for childbirth, the health workers or staff responded to my questions or concerns: Bere a mewo asopiti a merekwo no, adwumayefo no yii me nsemmissa ne mehaw ano:**

- Strongly agree/Mo gba gan-an
- Agree/Mo gba
- Neutral/Mi o fi sibikan
- Disagree/Mi o gba
- Strongly disagree/Mi o gba rara
- Unknown/MI o mo

### Childbirth

**14. a) At your most recent childbirth, did you have one baby or two babies (twins)? Nansa yi awoo a wowoe no, wowoo baako anaa ntaafoo?**

- One baby (single birth)/oba baako (awoo baako)
- Two babies (twins, multiple birth)/ Ntafoo/Ntahlenasa anaa nea εboro saa

### Baby

**\* 14. b) What is the sex of your baby? Wowoo den?**

- Male/Obarima
- Female/Obaa
- Unknown/Yennim

Press + if entering more than one baby (twins), or press next if entering one baby (single birth). *Mia [+]*se woretwerε ama ntaafoo, anaa mia nea edi so no se woretwerε ama abofra baako

**Childbirth1**

**15. a) Did you have a preferred position to give birth in? (for example, squatting on the floor, lying on your back, kneeling, on all fours, lying on your side) *Na wowo okwan ptee bi a na wope se anka wofa so wo? (Se ebia wobekoto, beda wakyi, wobebu nkotodwe anaa wobeda wo nkyen mu)***

- No/Dabi
- Yes/Aane
- Refuse/Wampene
- Don't know/Unknown /(Mennim)/Yennim

**b) Were you permitted to deliver in this position? *Yepene maa wowoo wo okwan yei so?***

- No/Dabi
- Yes/Aane
- Refuse/Wampene
- Don't know/Unknown /(Mennim)/Yennim

**c) What position did you give birth in? *Okwan ben so na wofa woe?***

- Dorsal/supine /Se woda wakyi na wani hwe wim
- Lithotomy/Se wobeda wakyi na wode wo nan asi mpa no so
- On all fours/Se wode wo nan ne wo nsa sisi ho
- Squatting /Se wakoto ho
- Sitting/Se wote ho
- Lying on her side/Se woda wo nkyen mu
- Other/Afofro
- Unknown/Yennim

**If Other, specify: *Se afoforo bi a, kyere***

**16. a) Which health worker looked after you most of the time during your childbirth in hospital? *Apomuden mu odwumayeni ben na ohwee wo so pii bere a worekwo wo asopiti no?***

- No attendant/Na obiara nni ho
- Obstetrician/Obenfo wo awo mu
- Resident Doctor/Dokota
- Midwife/Awogyefoo no
- Nurse/Neesse
- Medical Student/Osuani wo Dokota mu
- Midwifery Student/Osuani wo Dokota mu
- Other/Afoforo
- Unknown/Not Sure/Mennim/Mentumi nhu

If Other, specify: *Sɛ afoforo bi a, kyere*

---

**b) During your admission for childbirth, how often was any health worker present? Bere a wowɔ asopiti a worekɔwo no mperɛ sɛn na na apɔmuden adwumayefo wɔ ho?**

- Always/Bere biara
- Most of the time/Mpɛn pii
- Some of the time/Mpɛn kakra
- Never/Koraa
- Unknown/Yennim

**c) Was any health worker present when the baby came out? Bere a na abofra no reba no na odwumayeni bi wɔ ho?**

- No/Dabi
- Yes/Aane
- Refuse/Wampene
- Don't know/Unknown /(Mennim)/Yennim

**17. a) During your time in hospital, did you need a language interpreter? Bere a wowɔ asopiti no na wohia obi sɛ ɔɔkyerɛ wo kasa no ase?**

- No/Dabi
- Yes/Aane
- Refuse/Wampene
- Don't know/Unknown /(Mennim)/Yennim

**b) Was an interpreter available? Na nea ɔɔkyerɛ wo kasa no ase wɔ ho?**

- No/Dabi
- Yes/Aane
- Refuse/Wampene
- Don't know/Unknown /(Mennim)/Yennim

**c) Who provided language interpretation for you? Hwan na ɔkyerɛ kasa no ase?**

- Professional interpreter/Obi a yatete no wɔ kasa ase kyere mu
- Staff member/Apomuden dwumayeni
- Family member/Obusuan
- Another patient/Opemfo fofro
- Someone else/Obi fofro)

If Someone else, specify: *Se obi foforo bi a, kyere:*

---

**Childbirth2**

**18. Were curtains, partitions, or other measures used to provide privacy for you from other patients, patients' family members, or health workers/staff not involved in providing you care? *Yede ntoma twaa edan no mu senea ebeye na obi a onka wahwefo no ho nhunu wo ho?***

- No/Dabi
- Yes/Aane
- Refuse/Wampene
- Don't know/Unknown /(Mennim)/Yennim

**19. a) Did you have a bed to yourself during labour? *Na w'ankasa wowo mpa?***

- No/Dabi
- Yes/Aane
- Refuse/Wampene
- Don't know/Unknown /(Mennim)/Yennim

**b) Did you have a bed to yourself during childbirth? *Worekwo na w'ankasa na wowo mpa?***

- No/Dabi
- Yes/Aane
- Refuse/Wampene
- Don't know/Unknown /(Mennim)/Yennim

**c) Did you have a bed to yourself after you delivered but before you left the hospital (postpartum period)? *Bere a wowoe akyi kosii se ye yii wo koo fie no na wowo mpa?***

- No/Dabi
- Yes/Aane
- Refuse/Wampene
- Don't know/Unknown /(Mennim)/Yennim

**d) At any time, did you have to share a bed with another woman or women? *Bere a na wowo asopiti no eduru bere bi a na wo ne obaa foforo na eda mpa baako so?***

- No/Dabi
- Yes/Aane
- Refuse/Wampene
- Don't know/Unknown /(Mennim)/Yennim

**20. Were you or your baby detained in the hospital due to inability to pay hospital bills? *Yegyee wo ne wo ba no kaa asopiti efirise w'antumi antua asopiti ka no?***

- No/Dabi
- Yes/Aane
- Refuse/Wampene
- Don't know/Unknown /(Mennim)/Yennim



**Maternal Interventions**

**21. Did you receive any of the following procedures? *Yeyee wo nneema a edidi so yi bi?***

**a) 1. Was Caesarean section received? *Nje won se ise abe fun yin lati bi omo?***

- No/Dabi
- Yes/Aane
- Refuse/Wampene
- Don't know/Unknown /(Mennim)/Yennim

**2. If yes, was the procedure explained? *Se eye aane a yekyerere wo ase?***

- No/Dabi
- Yes/Aane
- Refuse/Wampene
- Don't know/Unknown /(Mennim)/Yennim

**3. If yes, did you agree to the procedure? *Se eye aane a wopenee nea yeyee wo no so***

- No/Dabi
- Yes/Aane
- Refuse/Wampene
- Don't know/Unknown /(Mennim)/Yennim

**b) 1. Was Episiotomy received? *Nje won ge ojuara yin bi?***

- No/Dabi
- Yes/Aane
- Refuse/Wampene
- Don't know/Unknown /(Mennim)/Yennim

**2. If yes, was the procedure explained? *Se eye aane a yekyerere wo ase?***

- No/Dabi
- Yes/Aane
- Refuse/Wampene
- Don't know/Unknown /(Mennim)/Yennim

**3. If yes, did you agree to the procedure? *Se eye aane a wopenee nea yeyee wo no so***

- No/Dabi
- Yes/Aane
- Refuse/Wampene
- Don't know/Unknown /(Mennim)/Yennim

**c) 1. Was hysterectomy received? *Nje won gbe ile omo yin jade bi??***

- No/Dabi
- Yes/Aane
- Refuse/Wampene
- Don't know/Unknown /(Mennim)/Yennim

**2. If yes, was the procedure explained? *Se eye aane a yekyerεε wo ase?***

- No/Dabi
- Yes/Aane
- Refuse/Wampene
- Don't know/Unknown /(Mennim)/Yennim

**3. If yes, did you agree to the procedure? *Se eye aane a wopenee nea yeyεε wo no so***

- No/Dabi
- Yes/Aane
- Refuse/Wampene
- Don't know/Unknown /(Mennim)/Yennim

**d) 1. Was tubal ligation / sterilization received? *Nje won so ile omo yin pa bi?***

- No/Dabi
- Yes/Aane
- Refuse/Wampene
- Don't know/Unknown /(Mennim)/Yennim

**2. If yes, was the procedure explained? *Se eye aane a yekyerεε wo ase?***

- No/Dabi
- Yes/Aane
- Refuse/Wampene
- Don't know/Unknown /(Mennim)/Yennim

**3. If yes, did you agree to the procedure? *Se eye aane a wopenee nea yeyεε wo no so***

- No/Dabi
- Yes/Aane
- Refuse/Wampene
- Don't know/Unknown /(Mennim)/Yennim

**e) 1. Was manual removal of placenta received? *Nje won fi owo yo ekeji/olubi omo yin bi?***

- No/Dabi
- Yes/Aane
- Refuse/Wampene
- Don't know/Unknown /(Mennim)/Yennim

2. If yes, was the procedure explained? *Se eye aane a yekyerere wo ase?*

- No/Dabi
- Yes/Aane
- Refuse/Wampene
- Don't know/Unknown /(Mennim)/Yennim

3. If yes, did you agree to the procedure? *Se eye aane a wopenee nea yeyee wo no so*

- No/Dabi
- Yes/Aane
- Refuse/Wampene
- Don't know/Unknown /(Mennim)/Yennim

**f) 1. Was assisted vaginal delivery (e.g: forceps or vacuum extraction) received? *Nje won lo irinse lati fa omo jade lati oju ara yin bi?***

- No/Dabi
- Yes/Aane
- Refuse/Wampene
- Don't know/Unknown /(Mennim)/Yennim

2. If yes, was the procedure explained? *Se eye aane a yekyerere wo ase?*

- No/Dabi
- Yes/Aane
- Refuse/Wampene
- Don't know/Unknown /(Mennim)/Yennim

3. If yes, did you agree to the procedure? *Se eye aane a wopenee nea yeyee wo no so*

- No/Dabi
- Yes/Aane
- Refuse/Wampene
- Don't know/Unknown /(Mennim)/Yennim

**g) 1. Was postpartum IUD? insertion received? *Nje afi oludena oyun/coil onifihe si inu ile omo ni kete ti e bi omo tau bi?***

- No/Dabi
- Yes/Aane
- Refuse/Wampene
- Don't know/Unknown /(Mennim)/Yennim

2. If yes, was the procedure explained? *Se eye aane a yekyerere wo ase?*

- No/Dabi
- Yes/Aane
- Refuse/Wampene
- Don't know/Unknown /(Mennim)/Yennim

3. If yes, did you agree to the procedure? *Se eye aane a wopenee nea yeyee wo no so*

- No/Dabi
- Yes/Aane
- Refuse/Wampene
- Don't know/Unknown /(Mennim)/Yennim

h) 1. Was induction of labor received? *Nje won lo oogun tabi gbe omisoke ki irobi le bere?*

- No/Dabi
- Yes/Aane
- Refuse/Wampene
- Don't know/Unknown /(Mennim)/Yennim

2. If yes, was the procedure explained? *Se eye aane a yekyerere wo ase?*

- No/Dabi
- Yes/Aane
- Refuse/Wampene
- Don't know/Unknown /(Mennim)/Yennim

3. If yes, did you agree to the procedure? *Se eye aane a wopenee nea yeyee wo no so*

- No/Dabi
- Yes/Aane
- Refuse/Wampene
- Don't know/Unknown /(Mennim)/Yennim

i) 1. Was augmentation of labor received? *Nje won gbe omisoke lati se iranwo ki e le bi omo kiakia?*

- No/Dabi
- Yes/Aane
- Refuse/Wampene
- Don't know/Unknown /(Mennim)/Yennim

2. If yes, was the procedure explained? *Se eye aane a yekyerere wo ase?*

- No/Dabi
- Yes/Aane
- Refuse/Wampene
- Don't know/Unknown /(Mennim)/Yennim

**3. If yes, did you agree to the procedure? *Sε εγε aane a wopenee nea γεγεε wo no so***

- No/Dabi
- Yes/Aane
- Refuse/Wampene
- Don't know/Unknown /(Mennim)/Yennim

**j) 1. Was shaving of your pubic hair received? *Nje won fa irun abe fun yin bi?***

- No/Dabi
- Yes/Aane
- Refuse/Wampene
- Don't know/Unknown /(Mennim)/Yennim

**2. If yes, was the procedure explained? *Sε εγε aane a γεkyerεε wo ase?***

- No/Dabi
- Yes/Aane
- Refuse/Wampene
- Don't know/Unknown /(Mennim)/Yennim

**3. If yes, did you agree to the procedure? *Sε εγε aane a wopenee nea γεγεε wo no so***

- No/Dabi
- Yes/Aane
- Refuse/Wampene
- Don't know/Unknown /(Mennim)/Yennim

**k) 1. Was Enema received? *Nje won ro omi ose to loworo si iho iyagbe yin bi?***

- No/Dabi
- Yes/Aane
- Refuse/Wampene
- Don't know/Unknown /(Mennim)/Yennim

**2. If yes, was the procedure explained? *Sε εγε aane a γεkyerεε wo ase?***

- No/Dabi
- Yes/Aane
- Refuse/Wampene
- Don't know/Unknown /(Mennim)/Yennim

**3. If yes, did you agree to the procedure? *Sε εγε aane a wopenee nea γεγεε wo no so***

- No/Dabi
- Yes/Aane
- Refuse/Wampene
- Don't know/Unknown /(Mennim)/Yennim

**1) 1. Was restitching of FGM scar received? *Nje won tun oju idabe yin ran?***

- No/Dabi
- Yes/Aane
- Refuse/Wampene
- Don't know/Unknown /(Mennim)/Yennim

**2. If yes, was the procedure explained? *Se eyε aane a yεkyerεε wo ase?***

- No/Dabi
- Yes/Aane
- Refuse/Wampene
- Don't know/Unknown /(Mennim)/Yennim

**3. If yes, did you agree to the procedure? *Se eyε aane a wopenee nea yεyεε wo no so***

- No/Dabi
- Yes/Aane
- Refuse/Wampene
- Don't know/Unknown /(Mennim)/Yennim

**\* 22. a) Is your baby alive today? \*Woba no te nkwa mu εnne?**

- No/Dabi
- Yes/Aane
- Refuse/Wampene
- Don't know/Unknown /(Mennim)/Yennim

Press + if entering more than one baby (twins), or press next if entering one baby (single birth). *Mia [+]* se woretwerε ama ntaafoo,anaa mia nea edi so no sε woretwerε ama abofra baako

**\* b) If No, was your baby alive when he/she was born? Sε eyε dabi a, εbere a wo woo no no na ɔte ase?**

- No/Dabi
- Yes/Aane
- Refuse/Wampene
- Don't know/Unknown /(Mennim)/Yennim

Press + if entering more than one baby (twins), or press next if entering one baby (single birth). *Mia [+]* se woretwerε ama ntaafoo,anaa mia nea edi so no sε woretwerε ama abofra baako

**\* c) If Yes, was your baby alive when you left hospital? Sε eyε aane a, na wo ba no te ase bere a na worefiri asopiti ho?**

- No/Dabi
- Yes/Aane
- Refuse/Wampene
- Don't know/Unknown /(Mennim)/Yennim

Press + if entering more than one baby (twins), or press next if entering one baby (single birth). *Mia [+]* se woretwerε ama ntaafoo,anaa mia nea edi so no sε woretwerε ama abofra baako

## Postpartum Depression

**As you have recently had a baby, we would like to know how you are feeling. Over the past two weeks, how often have you been bothered by any of the following problems? (*Wo woe nkyee, yepɛ sɛ yɛhu senea wo ho te?*) *Nnawɔtwe mmienu a atwamu akɔ yi, sɛn na nneema a edidi so yi bi aha wo?***

**23. a) Little interest or pleasure doing things: *Wani engye wɔ wadeyɛ mu:***

- Not at all/ Biribiara nhaa me
- Several days/Enna bebree
- More than half the days/Eboro nna no mu fa
- Nearly every day/eye aye se eda biara

**b) Feeling down, depressed or hopeless: *Waboto, Wo werɛ aho, anaa sɛ eyɛ wosɛ bibiara nyɛ yie:***

- Not at all/ Biribiara nhaa me
- Several days/Enna bebree
- More than half the days/Eboro nna no mu fa
- Nearly every day/eye aye se eda biara

**c) Trouble falling asleep, staying asleep, or sleeping too much: *Sɛ wontumi nna anaa woda dodo:***

- Not at all/ Biribiara nhaa me
- Several days/Enna bebree
- More than half the days/Eboro nna no mu fa
- Nearly every day/eye aye se eda biara

**d) Feeling tired or having little energy: *Se wabere anaa wonni ahooden:***

- Not at all/ Biribiara nhaa me
- Several days/Enna bebree
- More than half the days/Eboro nna no mu fa
- Nearly every day/eye aye se eda biara

**e) Poor appetite or overeating: *Se aduane nno wo kɔn anaa wodidi dodo:***

- Not at all/ Biribiara nhaa me
- Several days/Enna bebree
- More than half the days/Eboro nna no mu fa
- Nearly every day/eye aye se eda biara

**f) Feeling bad about yourself - or that you're a failure or have let yourself or your family down: *Se wani nnye wankasa wo ho, na aye se wadi wone wabusua fo hwanmo:***

- Not at all/ Biribiara nhaa me
- Several days/Enna bebree
- More than half the days/Eboro nna no mu fa
- Nearly every day/eye aye se eda biara



**g) Trouble concentrating on things, such as reading the newspaper or watching television: *Sɛ wadwen ntumi nsisi nneɛma so yiye sɛ ebia worehwɛ TV anaa worekan dawubɔ krataa:***

- Not at all/ Biribiara nhaa me
- Several days/Enna bebreɛ
- More than half the days/Eboro nna no mu fa
- Nearly every day/ɛye aye se eda biara

**h) Moving or speaking so slowly that other people could have noticed. Or, the opposite - being so fidgety or restless that you have been moving around a lot more than usual: *Wonante anaa wokasa brɛɛ a amanfo ahyɛ no nso---anaa wayɛ basaa na wo nante kyɛn sɛnea na woyɛ daa:***

- Not at all/ Biribiara nhaa me
- Several days/Enna bebreɛ
- More than half the days/Eboro nna no mu fa
- Nearly every day/ɛye aye se eda biara

**i) Thoughts that you would be better off dead or of hurting yourself in some way: *Ɛyɛ wo sɛ wowui a anka ɛyɛ anaa sɛ wobɛ pira wo ho:***

- Not at all/ Biribiara nhaa me
- Several days/Enna bebreɛ
- More than half the days/Eboro nna no mu fa
- Nearly every day/ɛye aye se eda biara

### Future Childbearing Intentions

24. In the future, I would like to have another child: *Mεπε σε μεwo bio daakye:*

- No/Dabi
- Yes/Aane
- Refuse/Wampene
- Don't know/Unknown /(Mennim)/Yennim

25. a) Based on your most recent childbirth experience in this hospital, where would you choose for your next childbirth? *Senaa yεfaa so hwεε wo wo asopiti ha no εhe na wobε πε σε wobεko akwo bio?*

- Same hospital/Asopiti ha bio
- Different hospital/Asopiti foforo
- At my home/εwo me fie
- At somebody else's home/εwo obi foforo fie
- Other/Afoforo
- Refuse/Wampene
- Don't know/Unknown/Mennim/Onnim

If Other, specify: *Se afoforo bi a, kyere:*

---

b) Do you agree or disagree with this statement: "I would recommend this hospital to a sister or friend" *Wogyε okasamu yi to mu: σε μεbo asopiti yi ho dawuro papa akyere menua anaa madamfo ama no ako ho*

- Strongly agree/Mepene so paa
- Agree/Mepene
- Neutral/Megyina mfinfini
- Disagree/Mempene so
- Strongly disagree/Mempene so koraa

**Satisfaction**

**Do you agree or disagree with the following statement: *Wogye saa akasamu yi to mu anaa wongye nto mu?***

**26. a) "During my stay at the hospital for childbirth, I feel that I had the opportunity to discuss any concerns I had with a health worker"? *"Megyi di se bere a me ko woo wo asopiti ho no, menyaa akwanya ne apomuden mu adwumayefo kaa nneema biara a na ehia/eha me ho asem"?***

- Strongly agree/Mepene so paa
- Agree/Mepene so
- Neutral/Megyina mfinfini
- Disagree/Mempene so
- Strongly disagree/Mempene so koraa
- Refuse/Wampene
- Unknown/Don't know/Mennim/Onnim

**b) "During my stay at the hospital for childbirth, I feel that I had the opportunity to discuss any preferences or requests I had with a health worker"? *"Megyi di se bere a me ko woo wo asopiti ho no, menyaa akwanya ne apomuden mu adwumayefo no kaa nea mepɛ ne mabisa deɛ ho asem"?***

- Strongly agree/Mepene so paa
- Agree/Mepene so
- Neutral/Megyina mfinfini
- Disagree/Mempene so
- Strongly disagree/Mempene so koraa
- Refuse/Wampene
- Unknown/Don't know/Mennim/Onnim

**c) "During my stay at the hospital for childbirth, I felt that the health education and information met my needs"? *"Megyi di se bere a me ko woo wo asopiti ho no, nkyerɛkyerɛ a menyae no wiee me pɛɛɛ"?***

- Strongly agree/Mepene so paa
- Agree/Mepene so
- Neutral/Megyina mfinfini
- Disagree/Mempene so
- Strongly disagree/Mempene so koraa
- Refuse/Wampene
- Unknown/Don't know/Mennim/Onnim

d) "I feel that my privacy was respected during examinations and treatments"? "Megye di se nhwehwemu ne ma yaresa koo so wokokoa mu a na mepene"?

- Strongly agree/Mepene so paa
- Agree/Mepene so
- Neutral/Megyina mfinfini
- Disagree/Mempene so
- Strongly disagree/Mempene so koraa
- Refuse/Wampene
- Unknown/Don't know/Mennim/Onnim

e) "During my stay at the hospital for childbirth, I feel that my cultural and religious needs were respected"? "Me koo wo asopiti no yede obuo ne nidie maa me som ne ma mamre"?

- Strongly agree/Mepene so paa
- Agree/Mepene so
- Neutral/Megyina mfinfini
- Disagree/Mempene so
- Strongly disagree/Mempene so koraa
- Refuse/Wampene
- Unknown/Don't know/Mennim/Onnim

f) "During my stay at the hospital for childbirth, I feel that the health workers treated me with respect"? "Me ko woo wo asopiti ho no, megye di se apomuden adwumayefo de obuo maa me"?

- Strongly agree/Mepene so paa
- Agree/Mepene so
- Neutral/Megyina mfinfini
- Disagree/Mempene so
- Strongly disagree/Mempene so koraa
- Refuse/Wampene
- Unknown/Don't know/Mennim/Onnim

g) "During my stay at the hospital for childbirth, health workers informed me about decisions that they took regarding my care"? "Me ko woo wo asopiti ho no, apomuden mu adwumayefo no boo me nsusui biara a wo faaye a na efa mehwe no ho"?

- Strongly agree/Mepene so paa
- Agree/Mepene so
- Neutral/Megyina mfinfini
- Disagree/Mempene so
- Strongly disagree/Mempene so koraa
- Refuse/Wampene
- Unknown/Don't know/Mennim/Onnim

**h) "During my labour, birth and postnatal care, I feel that I made shared decisions about my care with my health worker"? "Awo kaa me ne mawo ne mawo akyi nyinaa no eyε me se mekyerεε madwen fa okwan a wofa so hwε me no ho"?**

- Strongly agree/Mepene so paa
- Agree/Mepene so
- Neutral/Megyina mfinfini
- Disagree/Mempene so
- Strongly disagree/Mempene so koraa
- Refuse/Wampene
- Unknown/Don't know/Mennim/Onnim

**i) "During my stay at the hospital for childbirth, I feel that the amount of time I had to wait before seeing a health worker was not too long"? "Me ko woo wo asopiti ho no, megye di se bere a medii ansa na apomuden mu adwumayεni hwεε me no ankyε pii"**

- Strongly agree/Mepene so paa
- Agree/Mepene so
- Neutral/Megyina mfinfini
- Disagree/Mempene so
- Strongly disagree/Mempene so koraa
- Refuse/Wampene
- Unknown/Don't know/Mennim/Onnim

**j) "The facility where I gave birth had adequate water"? "Baabi a meko woe no na nsuo, anyinam a hooden ne ahotεε wo ho"?**

- Strongly agree/Mepene so paa
- Agree/Mepene so
- Neutral/Megyina mfinfini
- Disagree/Mempene so
- Strongly disagree/Mempene so koraa
- Refuse/Wampene
- Unknown/Don't know/Mennim/Onnim

**k) "The facility where I gave birth had adequate cleanliness"? "Ne nyinaa mu no ,mani gyee nea wo yε maa me no nyinaa ho wo mawo mu"?**

- Strongly agree/Mepene so paa
- Agree/Mepene so
- Neutral/Megyina mfinfini
- Disagree/Mempene so
- Strongly disagree/Mempene so koraa
- Refuse/Wampene
- Unknown/Don't know/Mennim/Onnim

l) "The facility where I gave birth had adequate electricity"? *"Bee a mewoe no na anyinam nkanea wo ho abere biara"?*

- Strongly agree/Mepene so paa
- Agree/Mepene so
- Neutral/Megyina mfinfini
- Disagree/Mempene so
- Strongly disagree/Mempene so koraa
- Refuse/Wampene
- Unknown/Don't know/Mennim/Onnim

m) "Overall, I am satisfied with the services I received during my stay at the hospital for childbirth"? *"Ne nyinaa mu no ,mani gyee nea woye maa me no nyinaa ho wo mawo mu"?*

- Strongly agree/Mepene so paa
- Agree/Mepene so
- Neutral/Megyina mfinfini
- Disagree/Mempene so
- Strongly disagree/Mempene so koraa
- Refuse/Wampene
- Unknown/Don't know/Mennim/Onnim

**Comment:**

---

**Interviewer Code:** *Nsemisa fo no ahyensode*

---

**Date Community Survey Tool completed:** *Da a mpotamu nsemisa/nhwehwemu no baa awiee*

yyyy-mm-dd

---

**Time Community Survey Tool completed:** *Bere a mpotamu nsemisa/nhwehwemu no baa awiee*  
(00:00-23:59)

---
